# Supplementary material for: Mesoporous NiO nanosphere: a sensitive strain sensor for determination of hydrogen peroxide
Source: Royal Society of Chemistry journal article supplement (doi:10.1039/c8ra01313f), 2018-01-01
Supplement: c8ra01313f1.pdf [file c8ra01313f1.pdf]

## **Mesoporous NiO nanosphere: a sensitive strain sensor for determination of hydrogen peroxide**

*Qin Li<sup>a</sup>, Wenbin Gao<sup>a</sup>, Xiaopeng Zhang<sup>a</sup>, Haitao Liu<sup>a,b</sup>, Meiling Dou<sup>a,b</sup>, Zhengping Zhang<sup>a,b,\*</sup> and Feng Wang<sup>a,b,\*</sup>*

a State Key Laboratory of Chemical Resource Engineering, Beijing Key Laboratory of Electrochemical Process and Technology for Materials, Beijing University of Chemical Technology, Beijing 100029, China.

b Beijing Advanced Innovation Center for Soft Matter Science and Engineering, Beijing University of Chemical Technology, Beijing 100029, China.

E-mail: [wangf@mail.buct.edu.cn](mailto:wangf@mail.buct.edu.cn); [zhangzhengping@mail.buct.edu.cn](mailto:zhangzhengping@mail.buct.edu.cn)

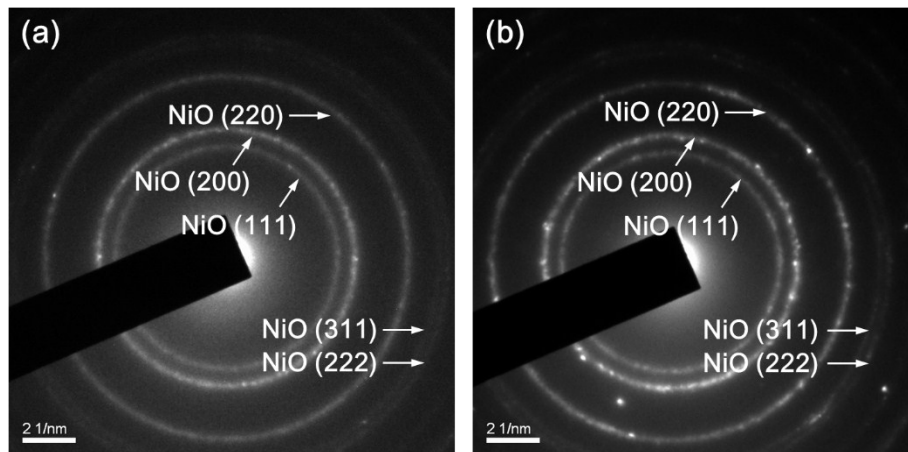

**Fig. S1** SAED patterns of a) NiO-MNS and b) NiO-NS.

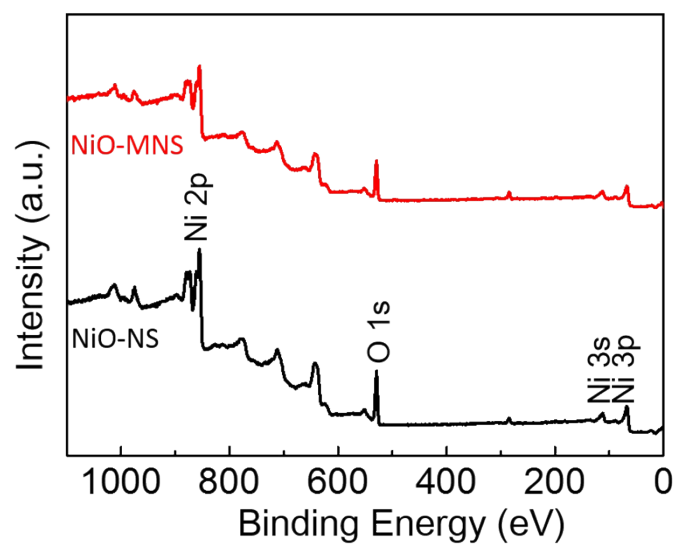

**Fig. S2** XPS survey spectra of the NiO-MNS and NiO-NS samples.

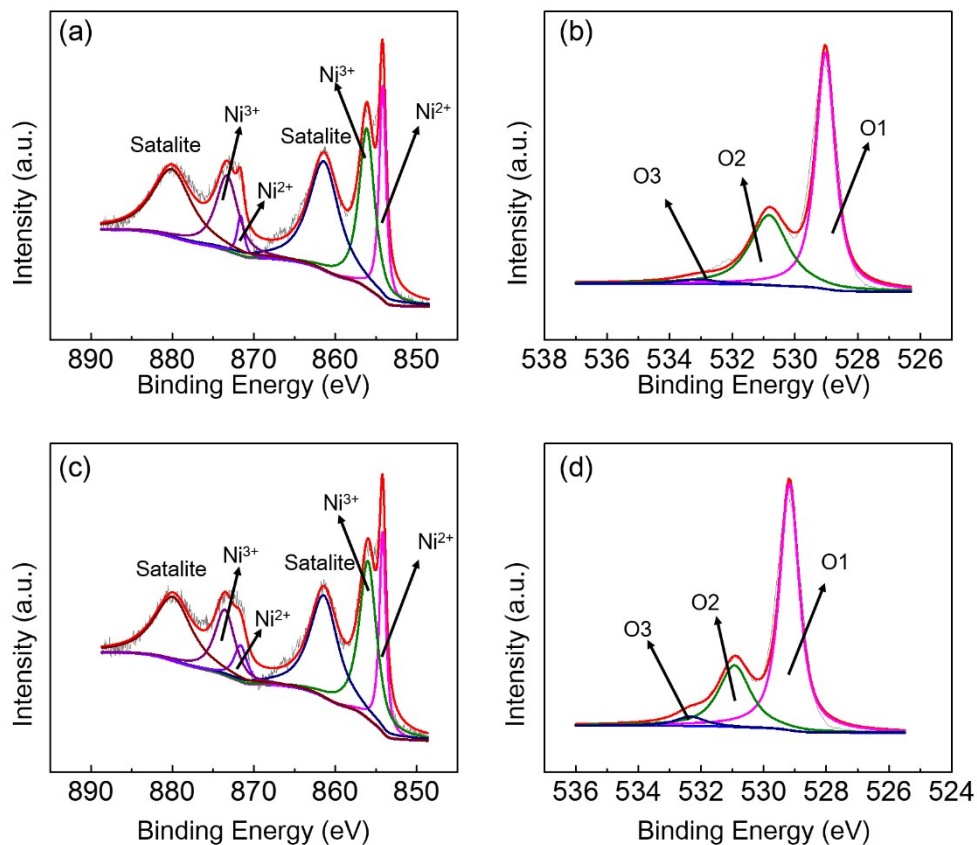

**Fig. S3** High-resolution XPS spectra of Ni 2*p* and O 1*s* for NiO-MNS (a, b) and NiO-NS (c, d), respectively.

**Table S1** The Ni- and O-content of NiO-MNS and NiO-NS. The capacitance of three Ni moieties and three O moieties of the above two samples.

| Sample  | Surface chemistry (XPS)                      |         |           |
|---------|----------------------------------------------|---------|-----------|
|         | Ni (at %)                                    |         | O (at %)  |
| NiO-MNS | 43.1                                         |         | 56.9      |
| NiO-NS  | 43.6                                         |         | 56.4      |
| Sample  | Functionality (at % of total Ni 2 <i>p</i> ) |         |           |
|         | Ni (II)                                      | Ni (II) | Satellite |
| NiO-MNS | 26.6                                         | 43.1    | 30.2      |
| NiO-NS  | 16.1                                         | 36.5    | 47.4      |
| Sample  | Functionality (% of total O 1 <i>s</i> )     |         |           |
|         | O1                                           | O2      | O3        |
| NiO-MNS | 62.0                                         | 35.6    | 2.4       |
| NiO-NS  | 68.3                                         | 27.8    | 3.9       |

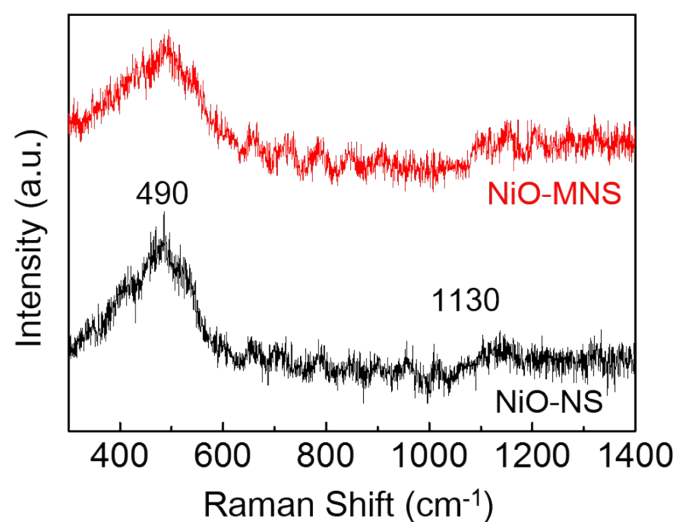

**Fig. S4** Raman spectra of the NiO-MNS and NiO-NS samples.

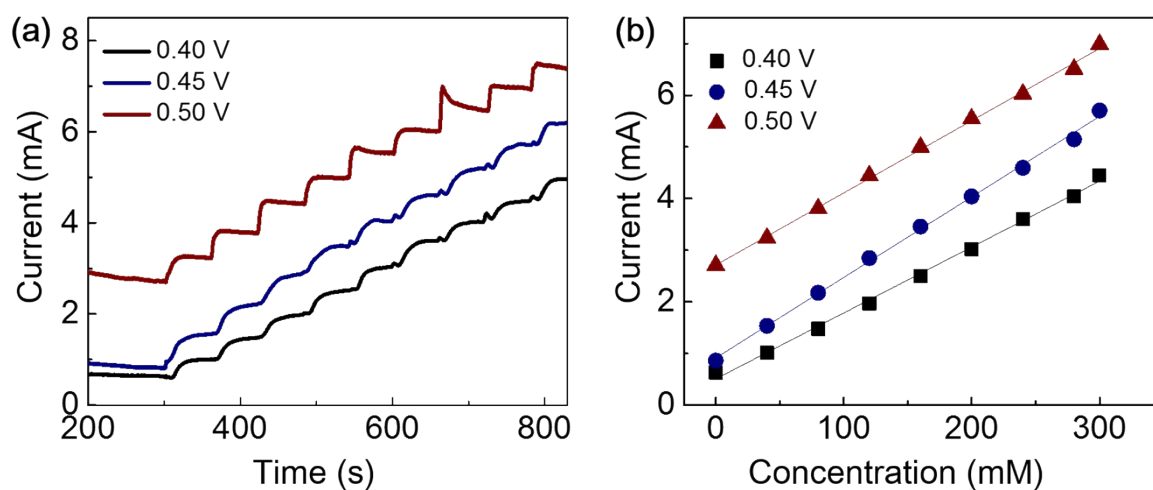

**Fig. S5** a) Chronoamperometric response of NiO-NS towards the step injection of 40 μM H<sub>2</sub>O<sub>2</sub> solution at different potentials. b) Linear relationship between the response current and the H<sub>2</sub>O<sub>2</sub> concentration.

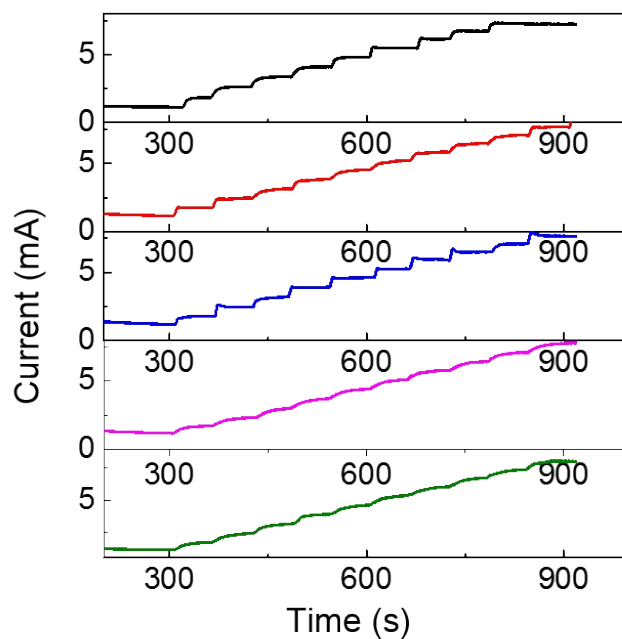

**Fig. S6** Chronoamperometric response of five parallel NiO-MNS sensors towards the injection of hydrogen peroxide at 0.45 V.

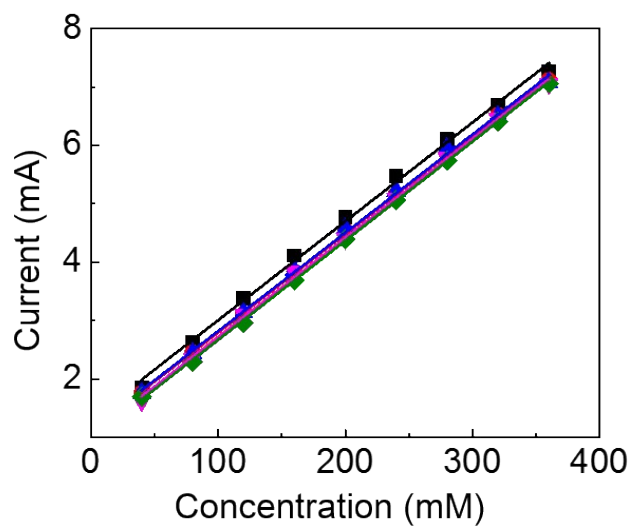

**Fig. S7** Linear relationship between the response current of five parallel sensors and the  $\text{H}_2\text{O}_2$  concentration.
